# Supplementary material
Source: PubMed Central journal article supplement (PMC2518058)

## Supplementary information

### Hinge stiffness is a barrier to RNA folding

Jörg C. Schlatterer, Lisa W. Kwok, Jessica S. Lamb, Hye Yoon Park, Kurt Andresen, Michael Brenowitz and Lois Pollack

**Supplementary Table 1** Summary of the rate constants derived by time-resolved hydroxyl radical footprinting experiments. Black corresponds to nucleotides from P4-P6, grey corresponds to nucleotides from isolated P5abc. No significant change in solvent accessibility was observed for the double mutant RNA. “p” indicates nucleotides which become *protected*, “e” denotes exposed nucleotides, and “nc” refers to nucleotides which don’t show changes in their solvent accessibility profile upon  $Mg^{2+}$  mediated folding. “na” stands for “data not available”.

**Supplementary Figure 1** Exemplary kinetic progress curves describing the  $Mg^{2+}$  mediated folding of P4-P6. The continuous lines are the fits to equation <1> as described in Materials and Methods. Each symbol represents an independent experiment. The fractional saturation scale is defined by CE buffer ( $\bar{Y} = 0.0$ ) and CE buffer plus  $Mg^{2+}$  ( $\bar{Y} = 1.0$ ). The rates for these progress curves are listed in Supplementary Table 1.

**Supplementary Figure 2** Magnesium dependency of wild-type P4-P6 and isolated P5abc domain tertiary structure. Magnesium titrations of RNAs were carried out in 18mM potassium cacodylate (pH 7.0) at 25°C. Midpoints and Hill constants were obtained from fits of fractional saturation versus  $MgCl_2$  concentration (mM) to the Hill equation. The protection site at nucleotide 155 showed the largest  $K_d$  value for P4-P6 (left) and P5abc (right) RNA of  $1.64 \pm 0.15$  ( $n_H = 0.95 \pm 0.1$ ) and  $1.2 \pm 0.17$  ( $n_H = 1.5 \pm 0.18$ ), respectively. In each panel the squares show the  $Mg(II)$  dependent relative extend of protection at nucleotide 155. The solid line correlates with the fit to the Hill equation.

The dotted line corresponds to the lowest Mg(II) concentration used in our experiments (10mM). The equilibrium data demonstrate that at our conditions the P4-P6 and P5abc structures are fully formed.

**Supplementary Figure 3** shows all time resolved data acquired on P4-P6 wild type (left) and double mutant (right), displayed as Kratky plots. In this commonly used formalism, compact states exhibit a peak at moderate 'q'<sup>1</sup>. Wild type P4-P6 begins to compact within ~ 10 milliseconds of the addition of Mg<sup>2+</sup>. There is no evidence of compaction in the double mutant, at times as long as 160 ms after the initiation of folding.

1. Porod, G. (1982). In *Small angle x-ray scattering* (Glatter, O. & Kratky, O., eds.). Academic Press, London.

Supplementary Table 1.

| Nucleotides | RNA   | Comment | Folding Rate in s <sup>-1</sup> at [Mg(II)] |          |            |
|-------------|-------|---------|---------------------------------------------|----------|------------|
|             |       |         | 10mM                                        | 50mM     | 100mM      |
| 122         | P4-P6 | e       | 11 ± 1.3                                    | 21 ± 3.3 | 27 ± 2.0   |
| 126         | P4-P6 | p       | 12 ± 0.8                                    | 31 ± 2.7 | 42 ± 2.2   |
| 139-140     | P4-P6 | p       | 13 ± 1.2                                    | 16 ± 2.3 | 26 ± 3.4   |
|             | P5abc | na      |                                             |          |            |
| 153         | P4-P6 | p       | 7 ± 1.4                                     | 15 ± 1.8 | 23 ± 3.9   |
|             | P5abc | nc      | -                                           | -        | -          |
| 154         | P4-P6 | p       | 10 ± 3.8                                    | 24 ± 2.9 | 24 ± 4.0   |
|             | P5abc | nc      | -                                           | -        | -          |
| 155         | P4-P6 | p       | 12 ± 2.4                                    | 17 ± 1.9 | 26 ± 4.5   |
|             | P5abc | e       | 2 ± 1.2                                     | 3 ± 1.0  | 7 ± 2.1    |
| 163-164     | P4-P6 | p       | 9 ± 0.8                                     | 12 ± 1.0 | 14 ± 1.0   |
|             | P5abc | p       | 3 ± 0.4                                     | 6 ± 0.5  | 6 ± 0.7    |
| 165         | P4-P6 | nc      | -                                           | -        | -          |
|             | P5abc | nc      | -                                           | -        | -          |
| 166         | P4-P6 | p       | 6 ± 0.8                                     | 8 ± 1.2  | 11 ± 0.9   |
|             | P5abc | nc      | -                                           | -        | -          |
| 167         | P4-P6 | nc      | -                                           | -        | -          |
|             | P5abc | e       | 4 ± 1.2                                     | 4 ± 0.6  | 10 ± 2     |
| 168         | P4-P6 | p       | 8 ± 1.5                                     | 10 ± 1.2 | 16 ± 1.1   |
|             | P5abc | nc      | -                                           | -        | -          |
| 169         | P4-P6 | p       | 8 ± 2.2                                     | 8 ± 1.4  | 16 ± 1.6   |
|             | P5abc | nc      | -                                           | -        | -          |
| 170         | P4-P6 | nc      | -                                           | -        | -          |
|             | P5abc | nc      | -                                           | -        | -          |
| 171         | P4-P6 | nc      | -                                           | -        | -          |
|             | P5abc | nc      | -                                           | -        | -          |
| 172         | P4-P6 | nc      | -                                           | -        | -          |
|             | P5abc | nc      | -                                           | -        | -          |
| 173         | P4-P6 | e       | 10 ± 0.6                                    | 10 ± 0.9 | 16 ± 3.3   |
|             | P5abc | e       | 6 ± 1.3                                     | 9 ± 1.3  | 15 ± 3.4   |
| 174         | P4-P6 | nc      | -                                           | -        | -          |
|             | P5abc | nc      | -                                           | -        | -          |
| 175         | P4-P6 | p       | 9 ± 0.8                                     | 11 ± 0.9 | 20 ± 2     |
|             | P5abc | p       | 5 ± 0.9                                     | 5 ± 0.5  | 8 ± 1.4    |
| 176         | P4-P6 | p       | 8 ± 0.8                                     | 12 ± 1.2 | 24 ± 4.1   |
|             | P5abc | p       | 6 ± 1.2                                     | 5 ± 1.0  | 7 ± 1.8    |
| 177         | P4-P6 | e       | 3 ± 0.5                                     | 6 ± 1.0  | 27 ± 2.7   |
|             | P5abc | e       | 0.7 ± 0.2                                   | 7 ± 1.3  | 7 ± 1.4    |
| 178         | P4-P6 | nc      | -                                           | -        | -          |
|             | P5abc | nc      | -                                           | -        | -          |
| 179         | P4-P6 | p       | 8 ± 0.5                                     | 11 ± 0.7 | 13 ± 1.2   |
|             | P5abc | p       | 6 ± 1.1                                     | 5 ± 0.7  | 8 ± 1.2    |
| 180-181     | P4-P6 | p       | 8 ± 0.4                                     | 11 ± 0.9 | 14 ± 1.1   |
|             | P5abc | p       | 6 ± 0.7                                     | 7 ± 0.8  | 9 ± 1      |
| 182         | P4-P6 | p       | 10 ± 0.5                                    | 12 ± 2.3 | 21 ± 2.3   |
|             | P5abc | p       | 4 ± 1.1                                     | 7 ± 1.0  | 9 ± 1.8    |
| 183-184     | P4-P6 | p       | 12 ± 1.2                                    | 16 ± 2.6 | 20.4 ± 1.8 |
|             | P5abc | p       | 4 ± 0.9                                     | 2 ± 0.6  | 7 ± 1.8    |
| 185-187     | P4-P6 | p       | 10 ± 0.6                                    | 12 ± 1.4 | 19 ± 1.4   |
|             | P5abc | nc      | -                                           | -        | -          |
| 200-201     | P4-P6 | p       | 8 ± 0.7                                     | 24 ± 2.6 | 34 ± 2.3   |
| 212-213     | P4-P6 | p       | 8 ± 0.8                                     | 14 ± 1.8 | 17 ± 1.8   |
| 224-225     | P4-P6 | p       | 7 ± 0.9                                     | 18 ± 2.7 | 24 ± 3.4   |

# Supplementary Figure 1

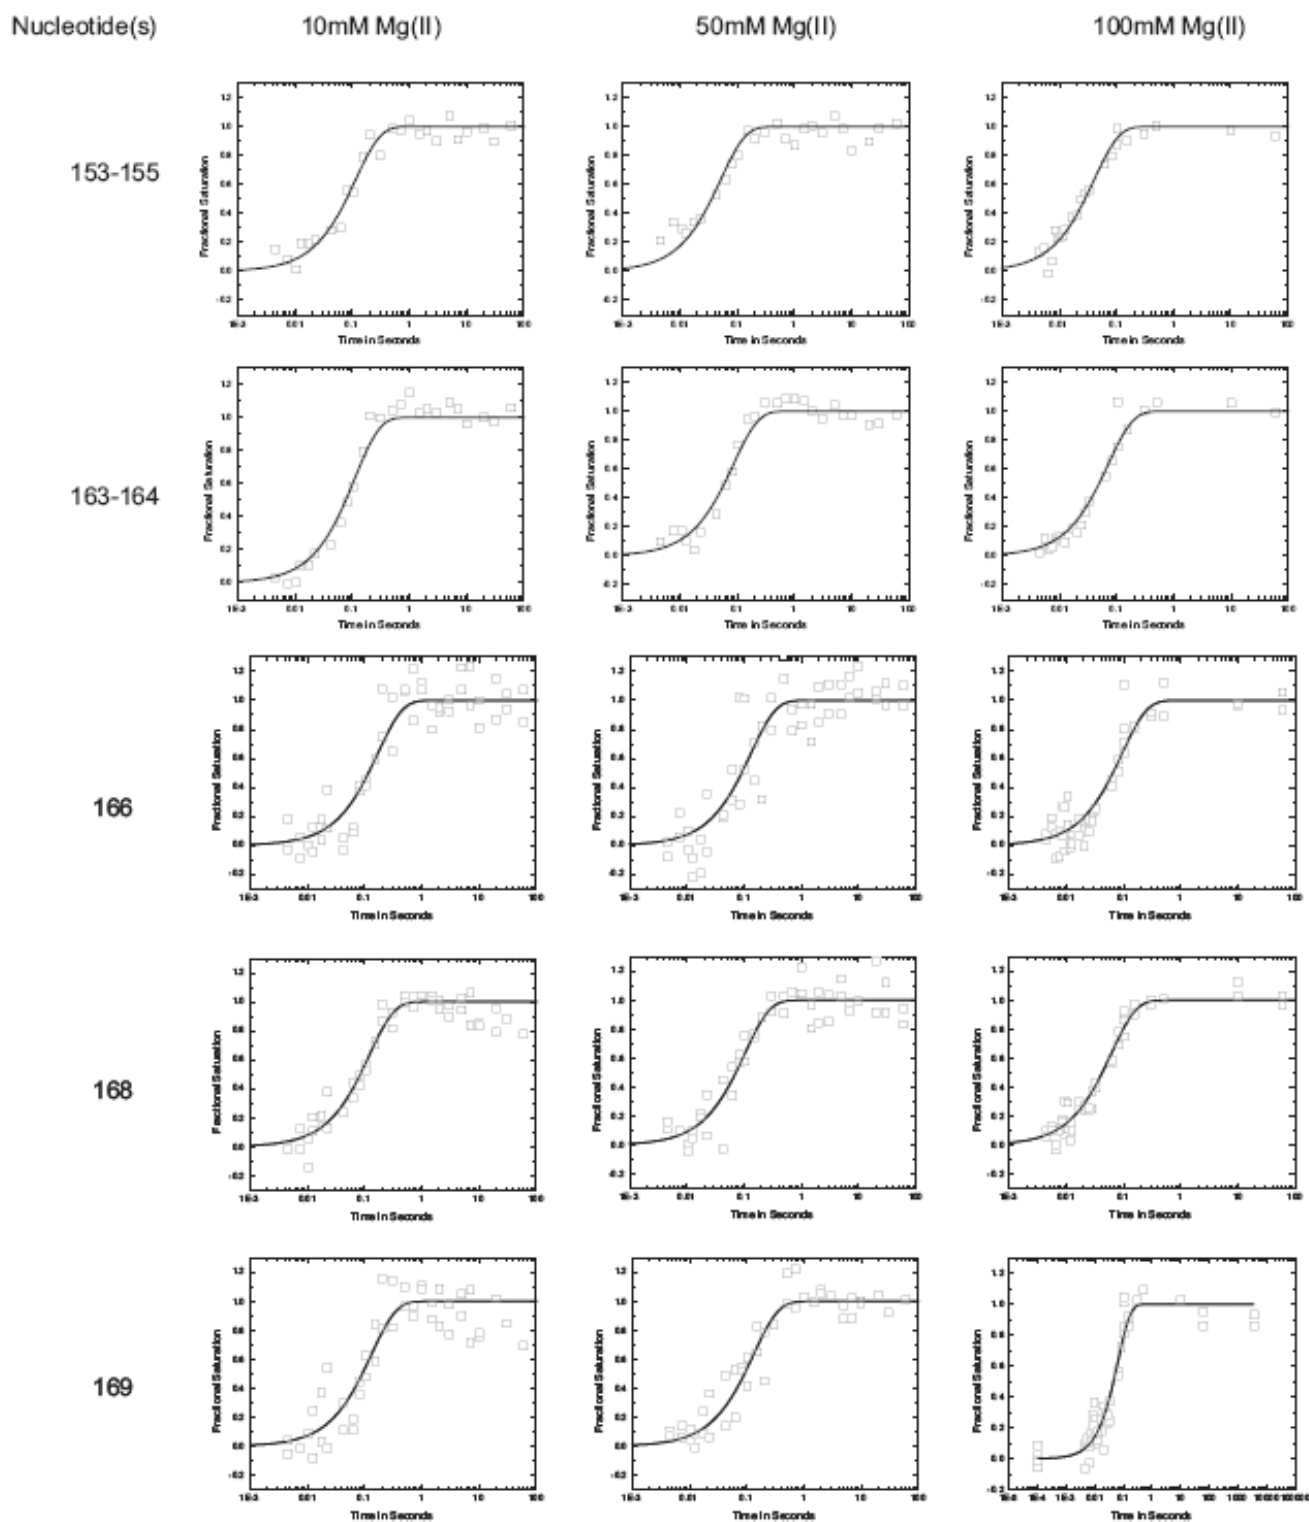

Nucleotide(s)

10mM Mg(II)

50mM Mg(II)

100mM Mg(II)

173

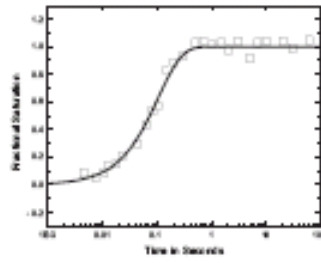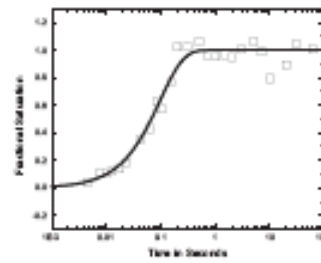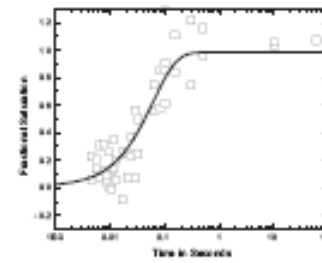

175

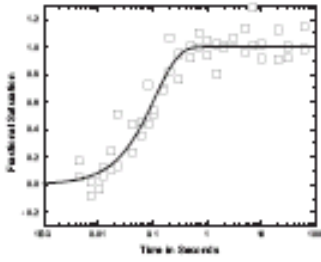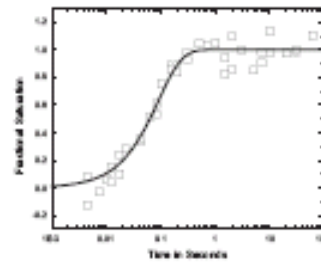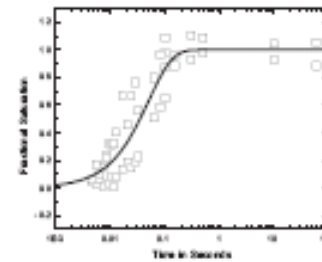

176

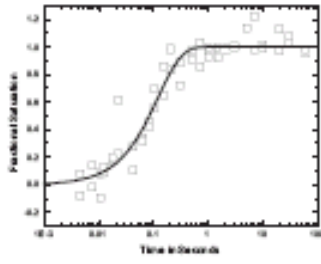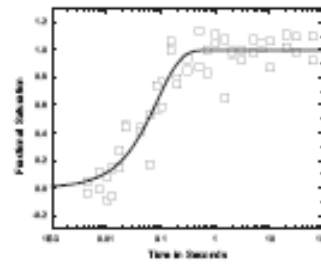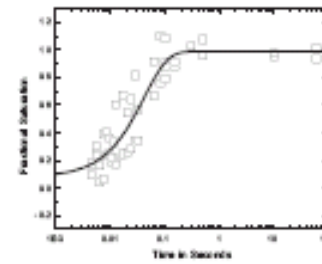

177

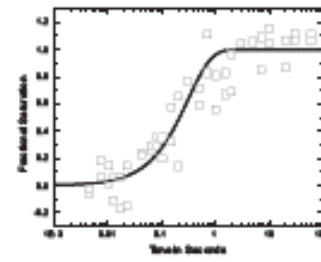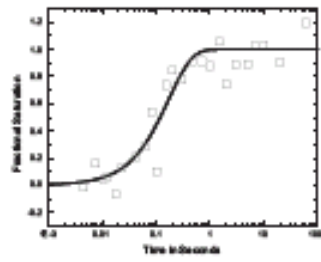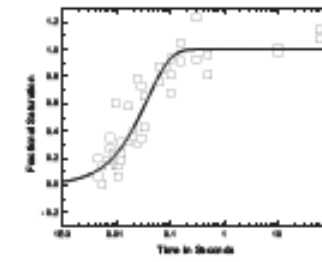

179

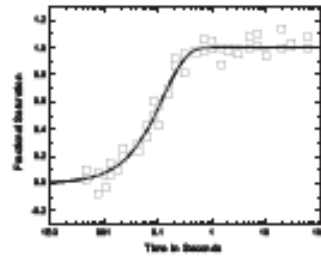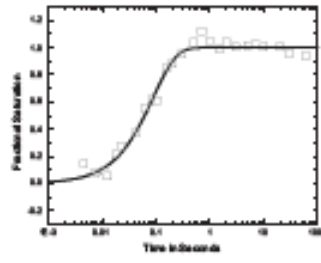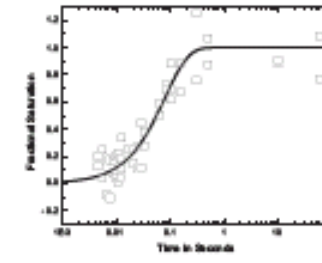

180-181

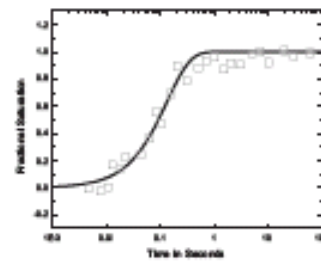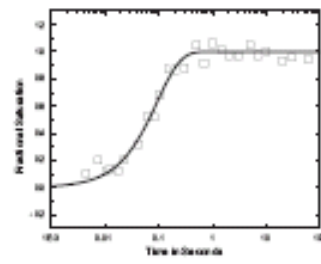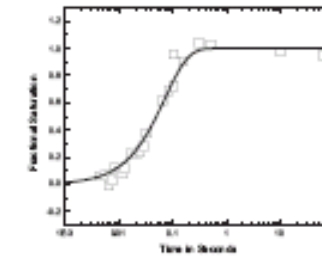

Nucleotide(s)

10mM Mg(II)

50mM Mg(II)

100mM Mg(II)

182

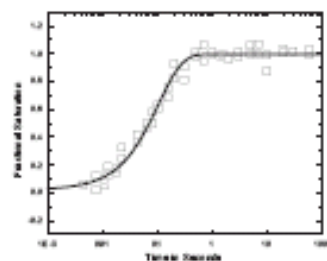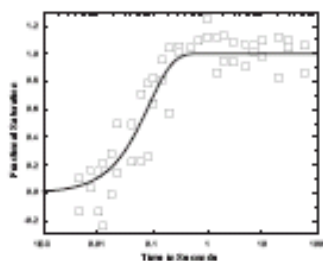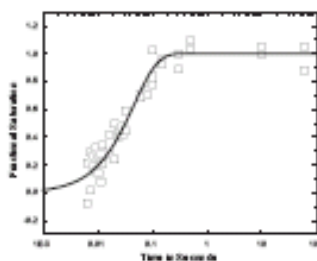

183-184

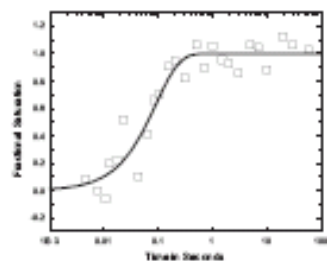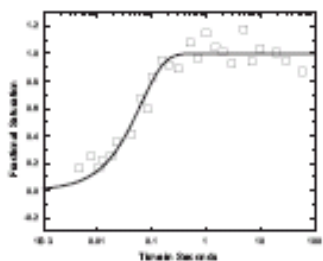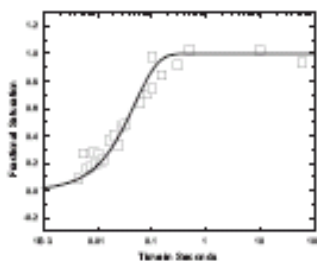

185-187

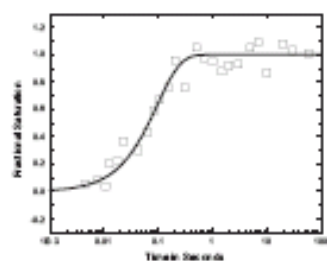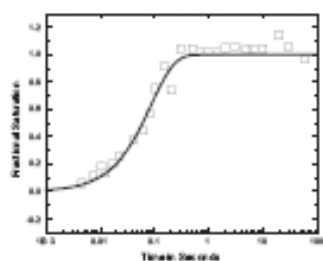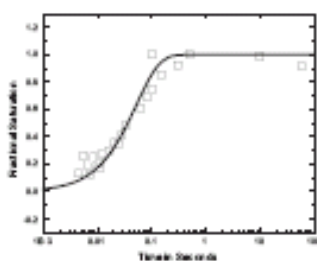

200-201

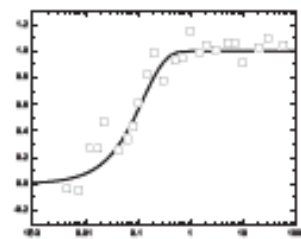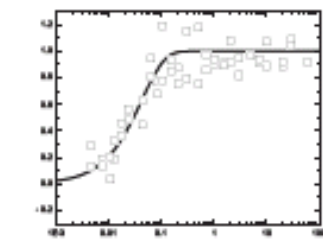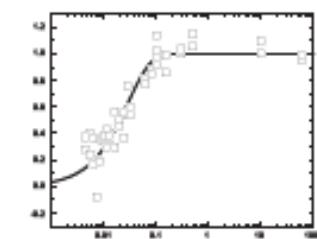

212-213

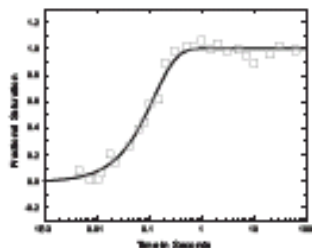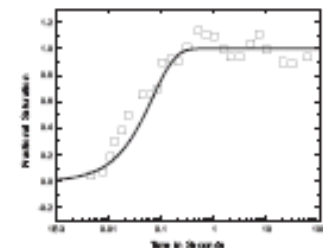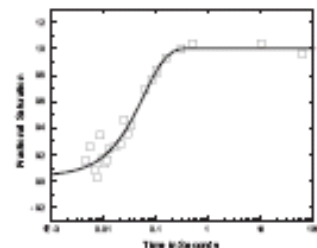

224-225

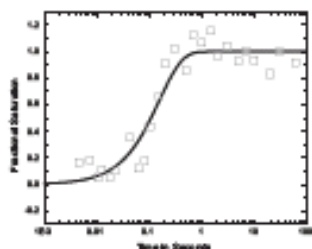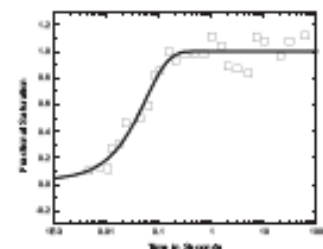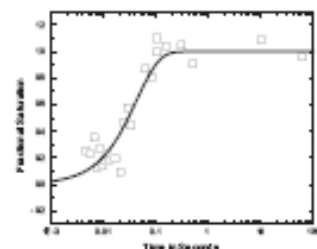

Supplementary Figure 2

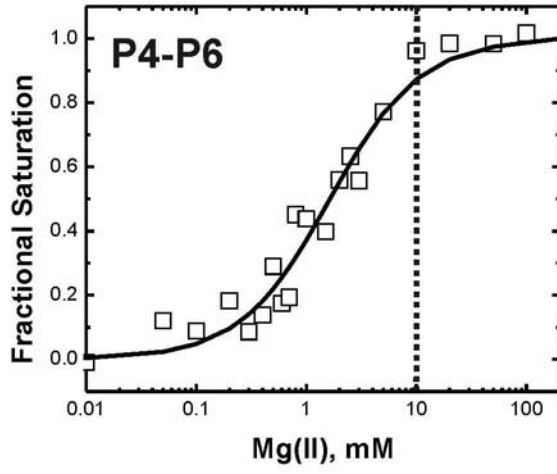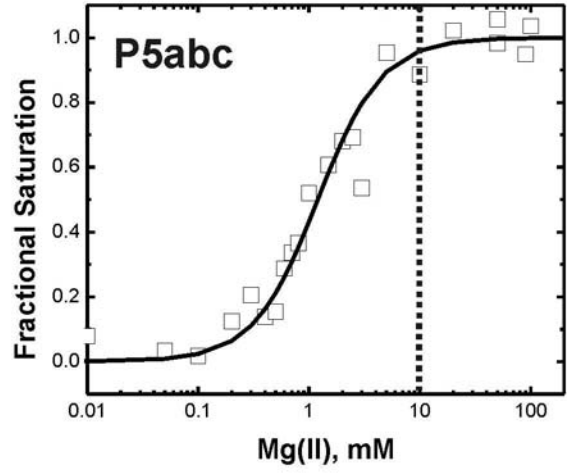

Supplementary Figure 3

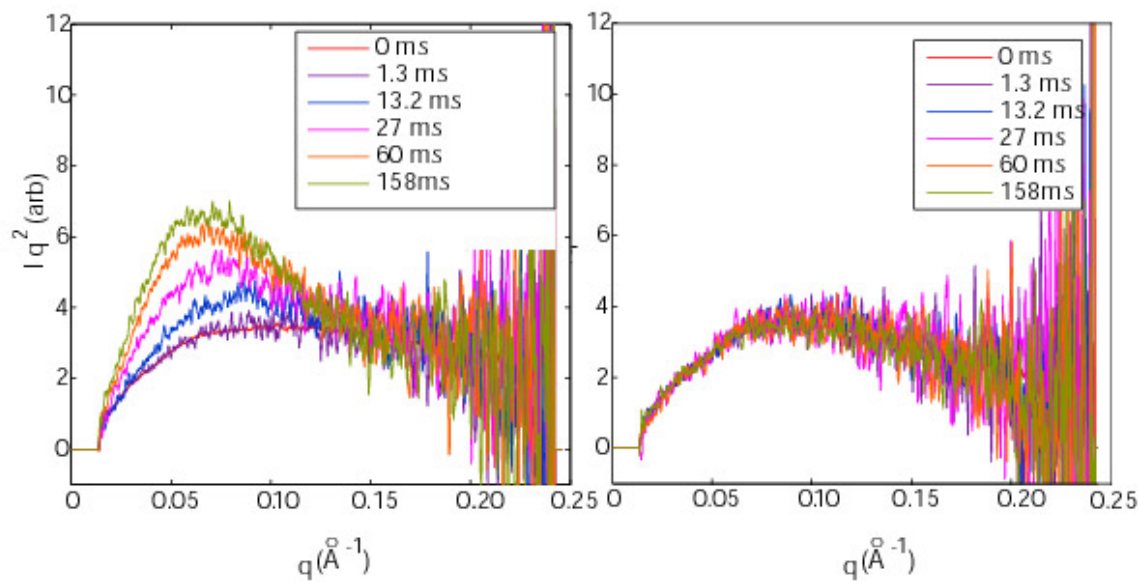

Supplement: NIHMS54322-supplement-01.pdf [file NIHMS54322-supplement-01.pdf]
